# Supplementary material
Source: Springer Nature journal article supplement (https://www.springermedizin.de/resource/supplementary/12888_2012_1253_MOESM3_ESM.pdf/9480770)

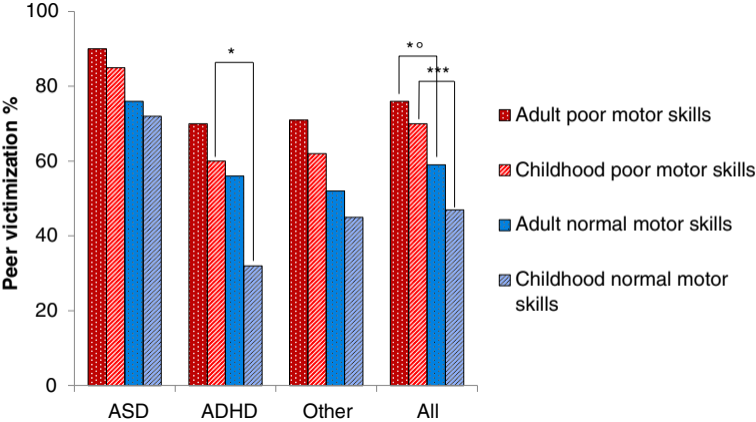

Supplement: MOESM3 [file 9480770]
